# Supplementary material for: Fluorescence Sensors Based on Hydroxycarbazole for the Determination of Neurodegeneration-Related Halide Anions
Source: MDPI journal article supplement (doi:10.3390/bios12030175), 2022-03-14
Supplement: s1 [file s1]

# Fluorescence sensors based on hydroxycarbazole for the determination of neurodegeneration-related halide anions

Víctor González-Ruiz <sup>1,2,3</sup>, Ángel Cores <sup>4</sup>, M. Mar Caja <sup>1</sup>, Vellaisamy Sridharan <sup>4,5</sup>, Mercedes Villacampa <sup>4</sup>, M. Antonia Martín <sup>1</sup>, Ana I. Olives <sup>1,\*</sup> and J. Carlos Menéndez <sup>4,\*</sup>

<sup>1</sup> Unidad de Química Analítica, Departamento de Química en Ciencias Farmacéuticas, Facultad de Farmacia, Universidad Complutense de Madrid, 28040 Madrid, Spain; [victor.gonzalez@unige.ch](mailto:victor.gonzalez@unige.ch) (V.G.-R.); [mcaja01@ucm.es](mailto:mcaja01@ucm.es) (M.M.C.); [mantonia@ucm.es](mailto:mantonia@ucm.es) (M.A.M.)

<sup>2</sup> School of Pharmaceutical Sciences and Institute of Pharmaceutical Sciences of Western Switzerland, University of Geneva, Rue Michel-Servet 1, 1211 Geneva 4, Switzerland (V.G.-R.)

<sup>3</sup> Swiss Centre for Applied Human Toxicology (SCATH), 4055 Basel, Switzerland (V.G.-R.)

<sup>4</sup> Unidad de Química Orgánica y Farmacéutica, Departamento de Química en Ciencias Farmacéuticas, Facultad de Farmacia, Universidad Complutense de Madrid, 28040 Madrid, Spain; [acores@ucm.es](mailto:acores@ucm.es) (Á.C.); [sridharan.che@cuajammu.ac.in](mailto:sridharan.che@cuajammu.ac.in) (V.S.); [mvsanz@ucm.es](mailto:mvsanz@ucm.es) (M.V.)

<sup>5</sup> Department of Chemistry and Chemical Sciences, Central University of Jammu, Rahya-Suchani (Bagla), District-Samba, Jammu-181143, J&K, India; [sridharan.che@cuajammu.ac.in](mailto:sridharan.che@cuajammu.ac.in) (V.S.)

\* Correspondence: [aiolives@ucm.es](mailto:aiolives@ucm.es) (A.I.O.); [josecm@ucm.es](mailto:josecm@ucm.es) (J.C.M.)

Figures S1 to S13

Tables S1 to S5

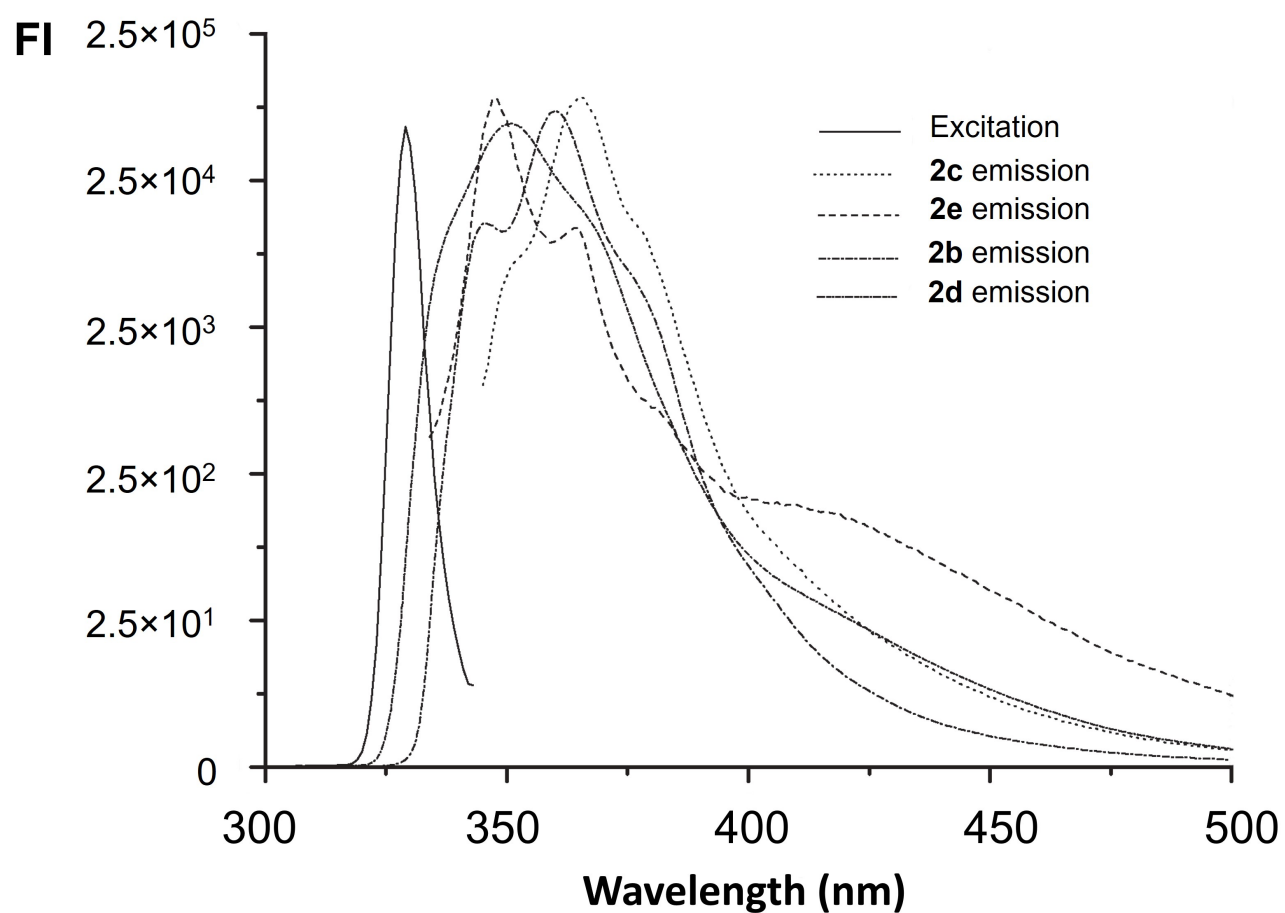

Figure S1. Excitation and fluorescence emission spectra of **2b-2e** in acetone. The fluorescence intensity (FI) in the excitation and emission spectra is normalized to the same intensity value. Wavelength in nm.

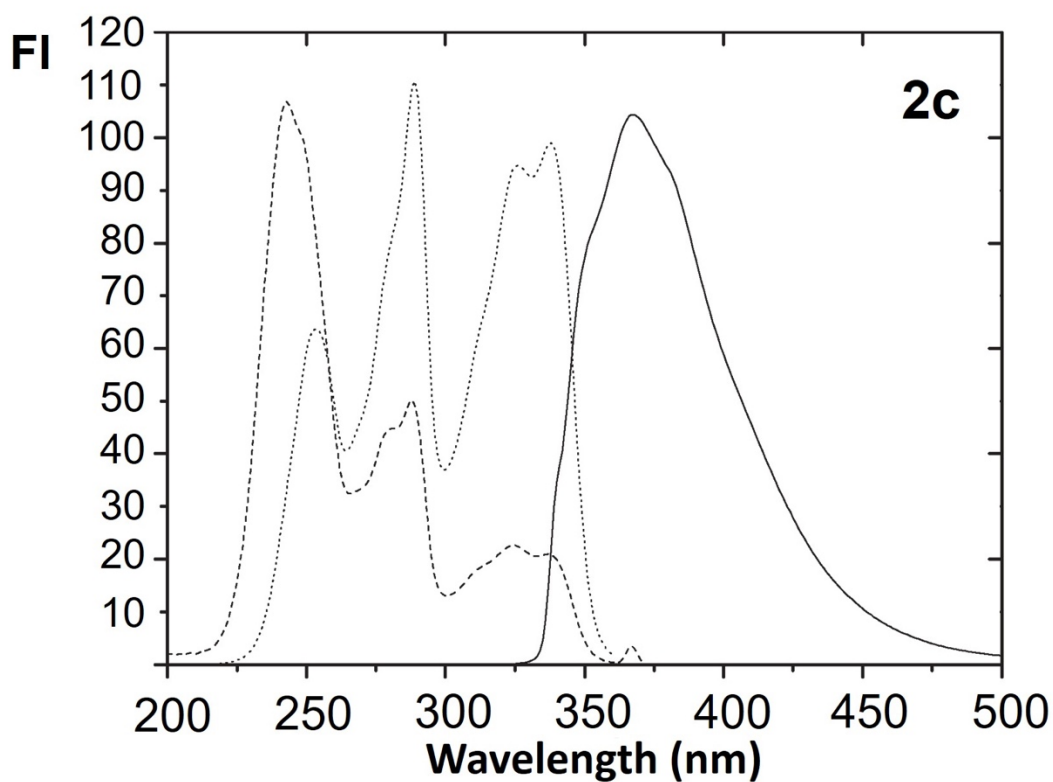

Figure S2. Corrected excitation and fluorescence emission ( $\lambda_{\text{ex}} = 340$  nm) spectra of **2c** in ethanol. The fluorescence intensity (FI) in the excitation and emission spectra is normalized to the same intensity value. Wavelength in nm.

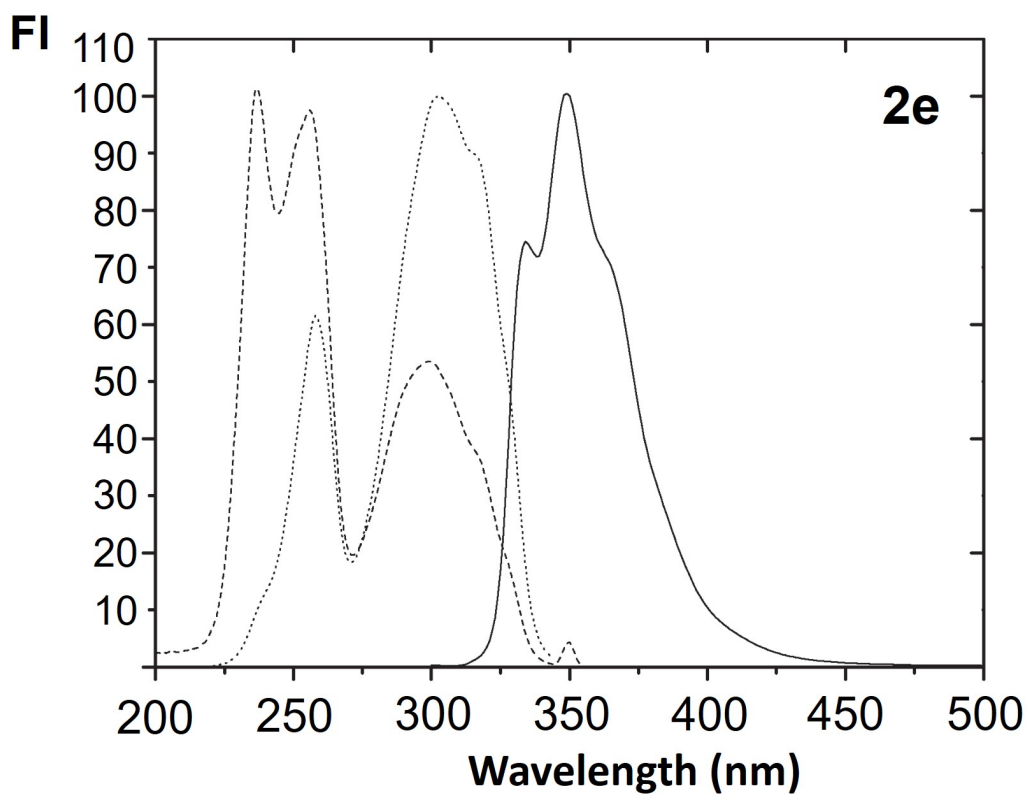

Figure S3. Corrected excitation and fluorescence emission ( $\lambda_{\text{ex}} = 290$  nm) spectra of **2e** in ethanol. The fluorescence intensity (FI) in the excitation and emission spectra is normalized to the same intensity value. Wavelength in nm.

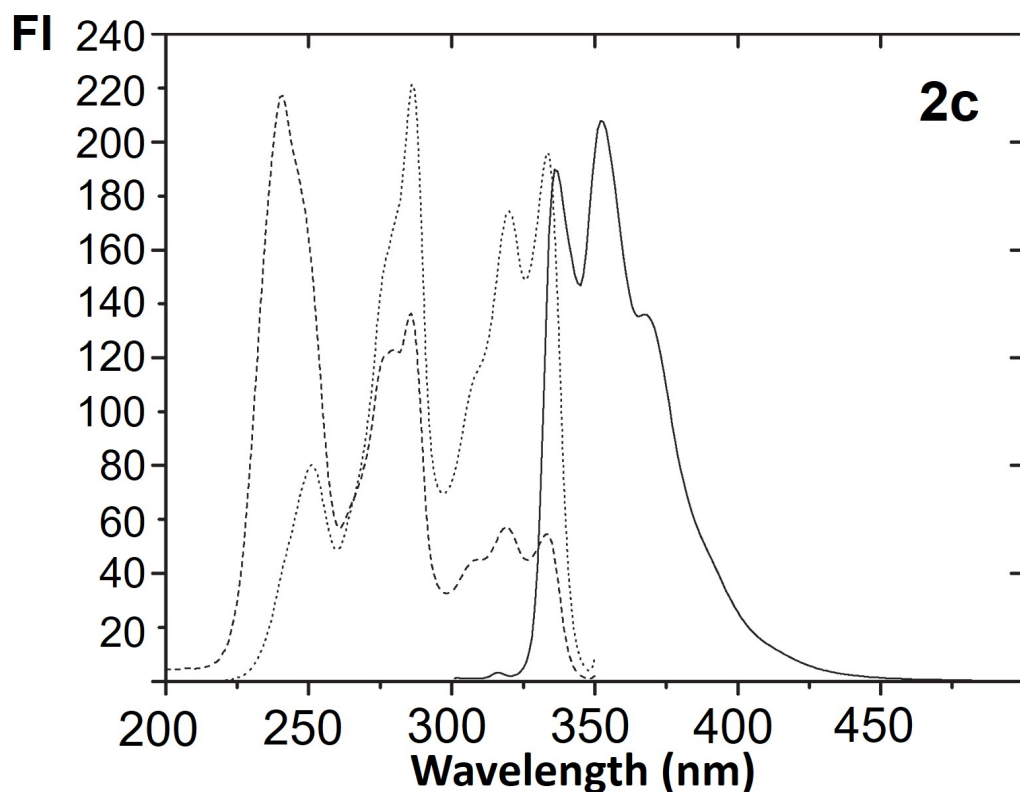

Figure S4. Corrected excitation and fluorescence emission ( $\lambda_{\text{ex}} = 290 \text{ nm}$ ) spectra of **2c** in cyclohexane. The fluorescence intensity (FI) in the excitation and emission spectra is normalized to the same intensity value. Wavelength in nm.

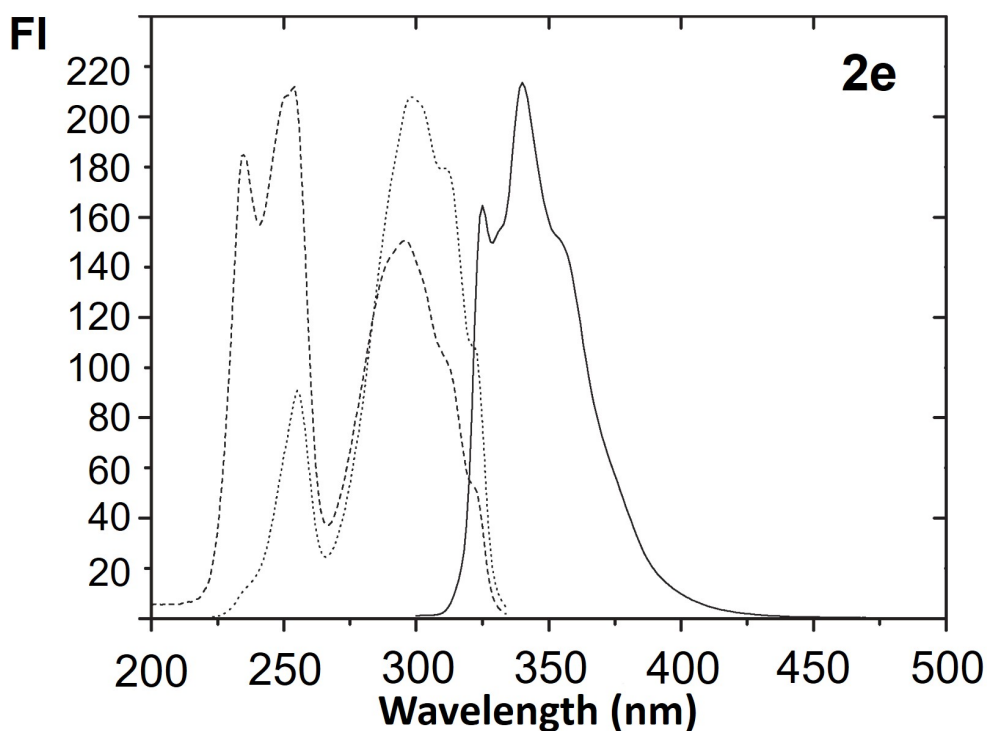

Figure S5. Corrected excitation and fluorescence emission ( $\lambda_{\text{ex}} = 290 \text{ nm}$ ) spectra of **2e** in cyclohexane. The fluorescence intensity (FI) in the excitation and emission spectra is normalized to the same intensity value. Wavelength in nm.

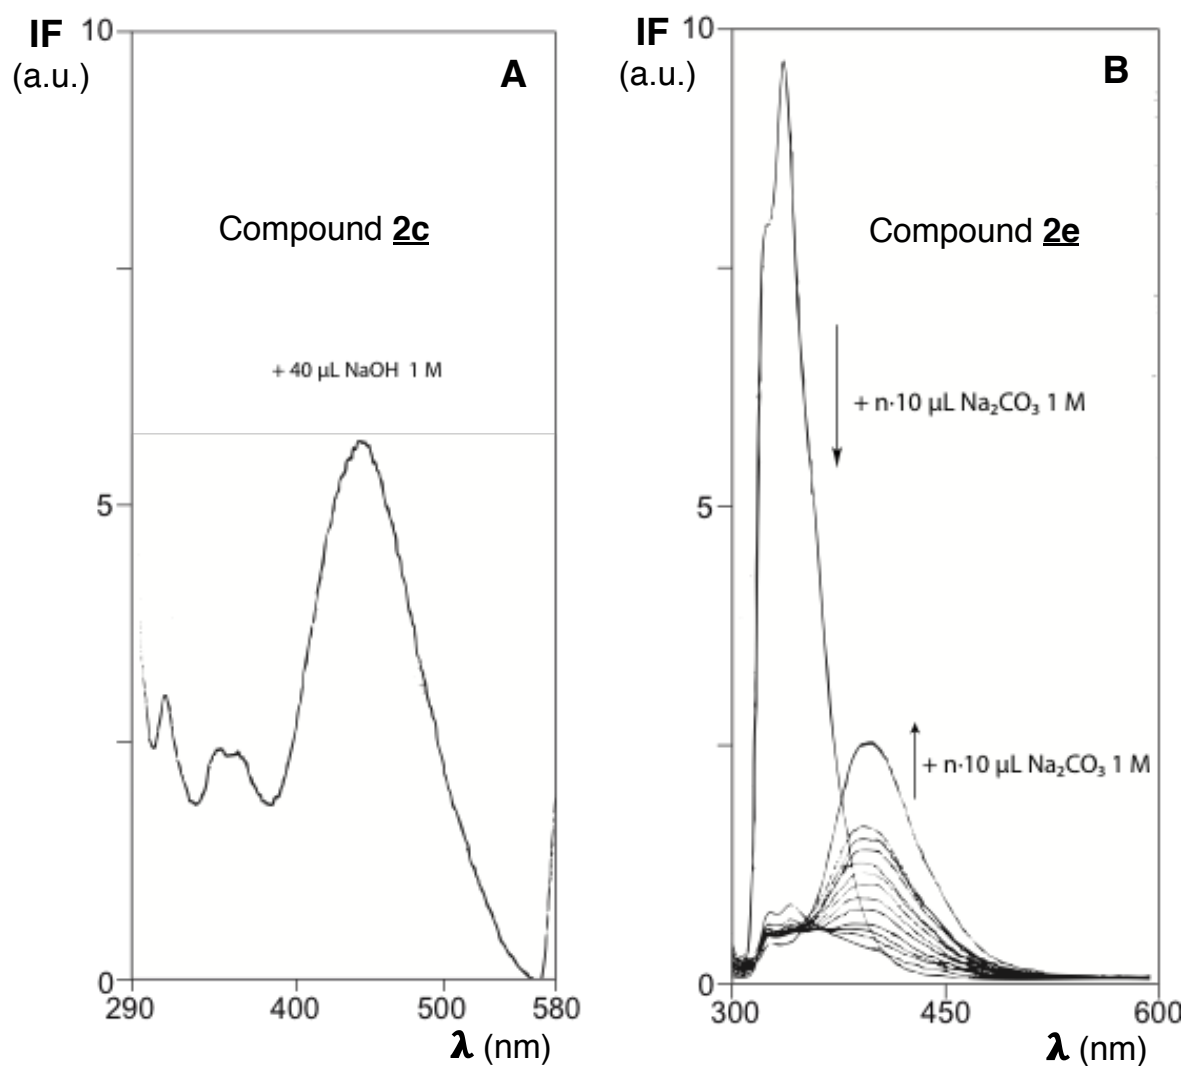

Figure S6. Fluorescence emission spectra illustrating the effect of bases addition on the fluorescence of hydroxycarbazole derivatives. (A) Compound **2c**, additions of NaOH in ethanol; (A) Compound **2e**, additions of increasing amounts of  $\text{Na}_2\text{CO}_3$  in water (B).

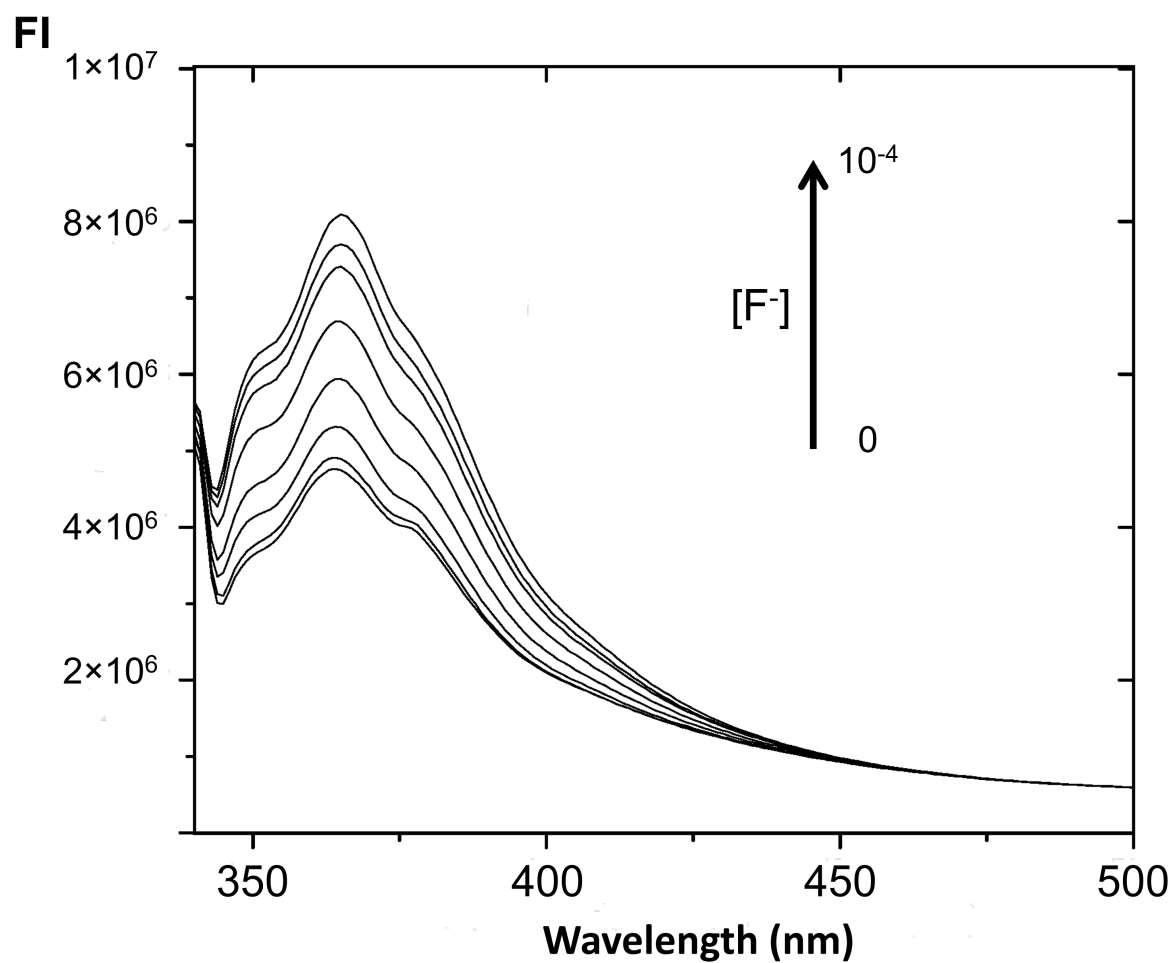

Figure S7. Overlaid fluorescence emission spectra of **2c** in acetone ( $\lambda_{\text{ex}}$  = 340 nm), in the presence of increasing concentrations of fluoride anion. FI: Fluorescence intensity in arbitrary units. Wavelength in nm.

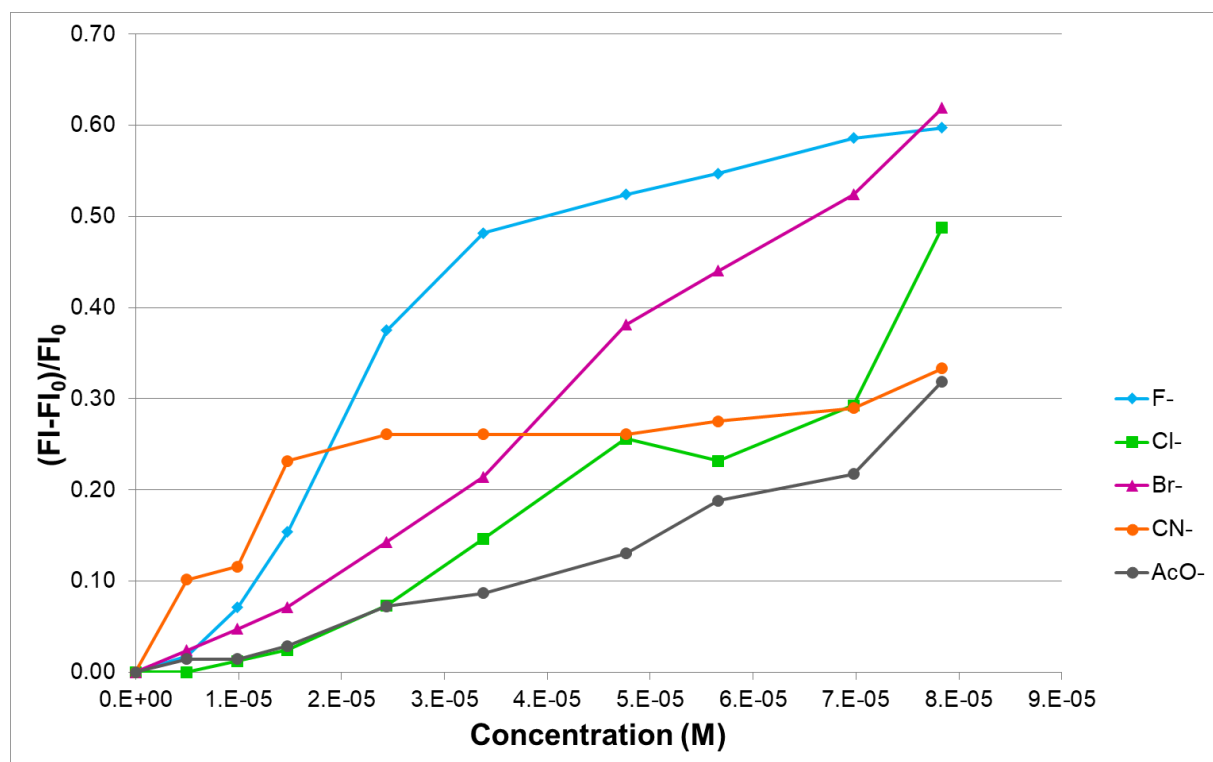

Figure S8. Fluorescence enhancement factor ( $(FI-FI_0)/FI_0$ ) obtained in the titration of compound **2c** with increasing concentrations of different anions in acetone.

FI: Fluorescence emission intensity value for the examined concentration of anion.

FI<sub>0</sub>: Fluorescence emission intensity value obtained for the sensor in absence of anion.

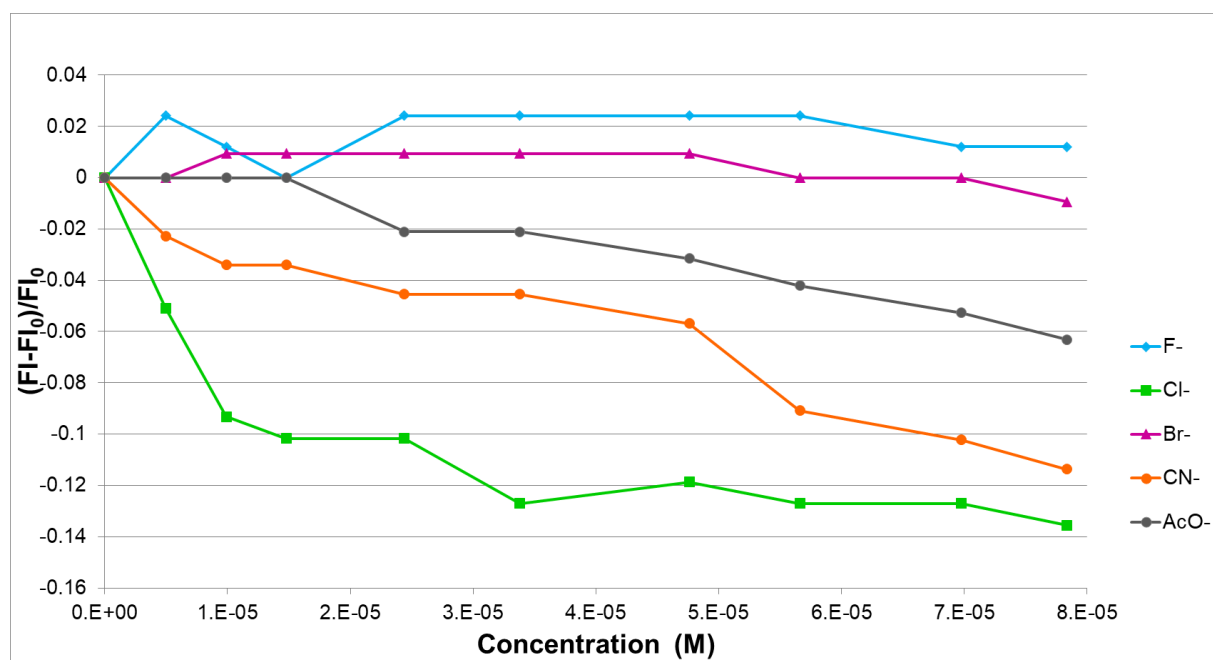

Figure S9. Fluorescence enhancement factor ( $(FI-FI_0)/FI_0$ ) obtained in the titration of compound **2c** with increasing concentrations of halide anions in ethanol.

FI: Fluorescence emission intensity value for the examined concentration of anion.

FI<sub>0</sub>: Fluorescence emission intensity value obtained for the sensor in absence of anion.

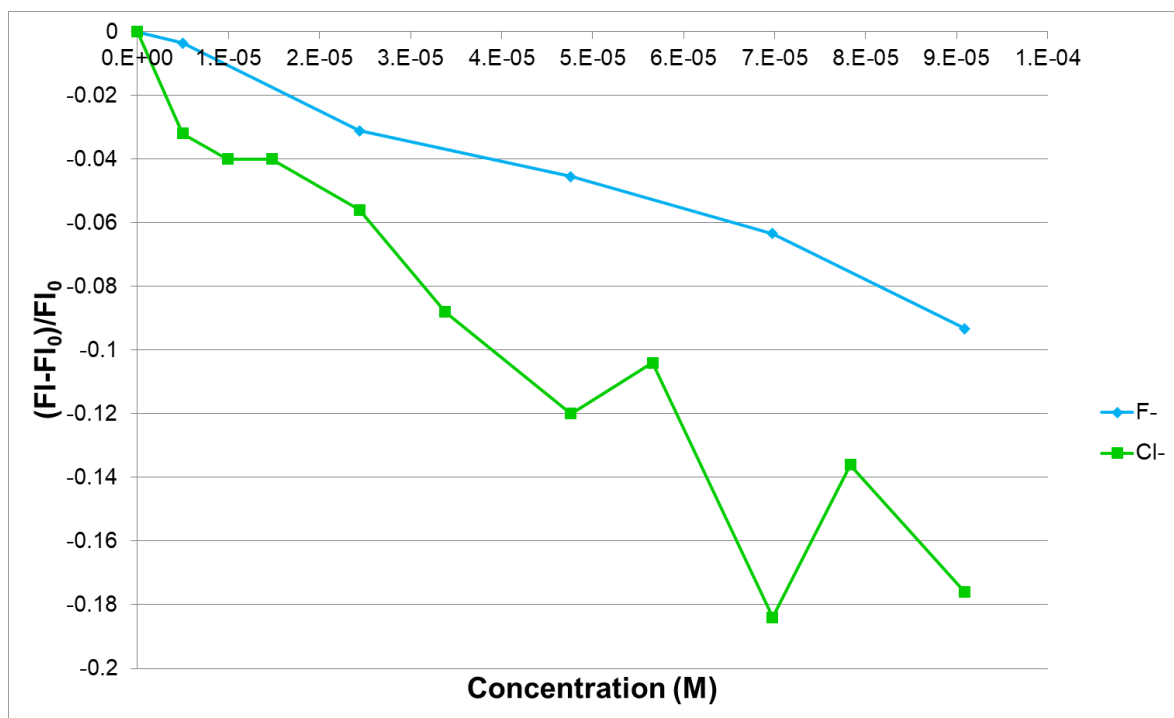

Figure S10. Fluorescence enhancement factor  $(FI-FI_0)/FI_0$  obtained in the titration of compound **2e** with increasing concentrations of different anions in acetone.

FI: Fluorescence emission intensity value for the examined concentration of anion.

FI<sub>0</sub>: Fluorescence emission intensity value obtained for the sensor in absence of anion.



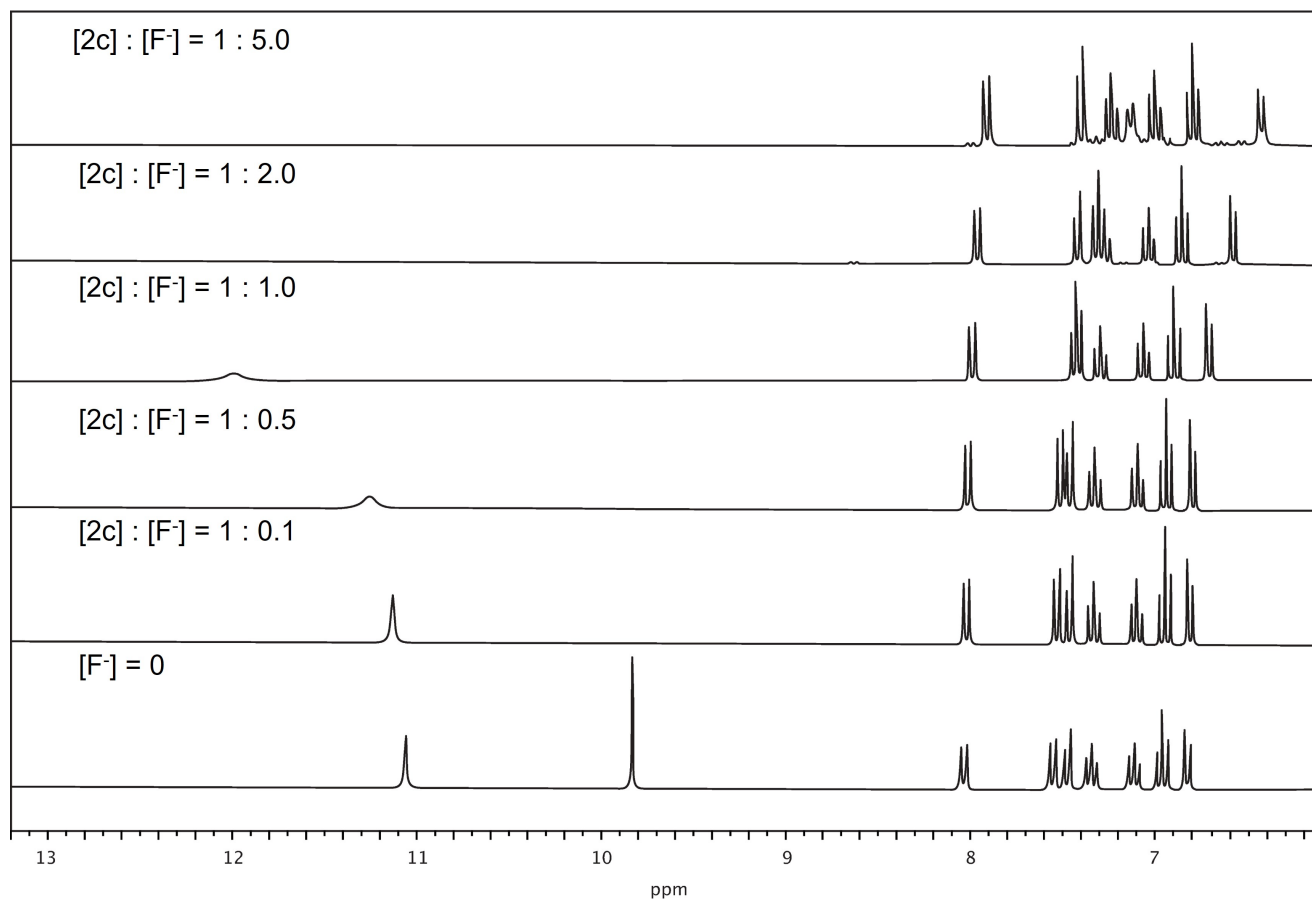

Figure S11.  $^1\text{H}$ -NMR spectra of fluorescence sensor **2c** in  $d_6$ -DMSO in the presence of fluoride anion at molar ratio indicated over each spectrum.

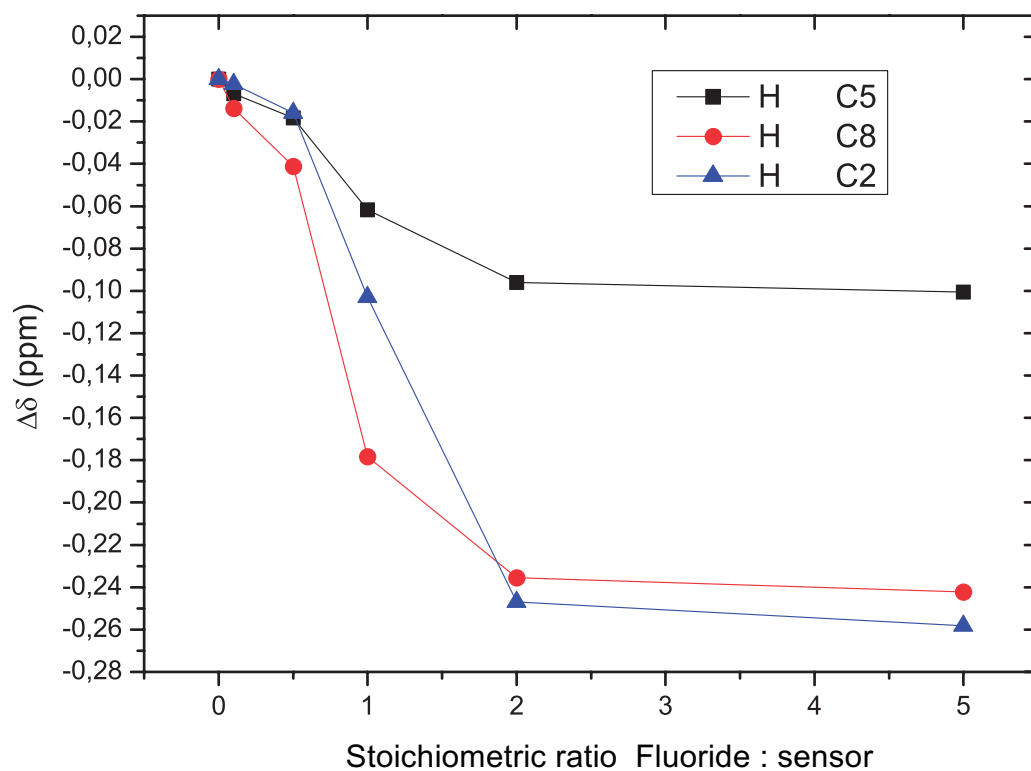

Figure S12. Decrease in the  $^1\text{H}$ -NMR spectra of fluorescence sensor **2c** in  $d_6$ -DMSO in the presence of fluoride anion at molar ratio indicated over each spectrum.

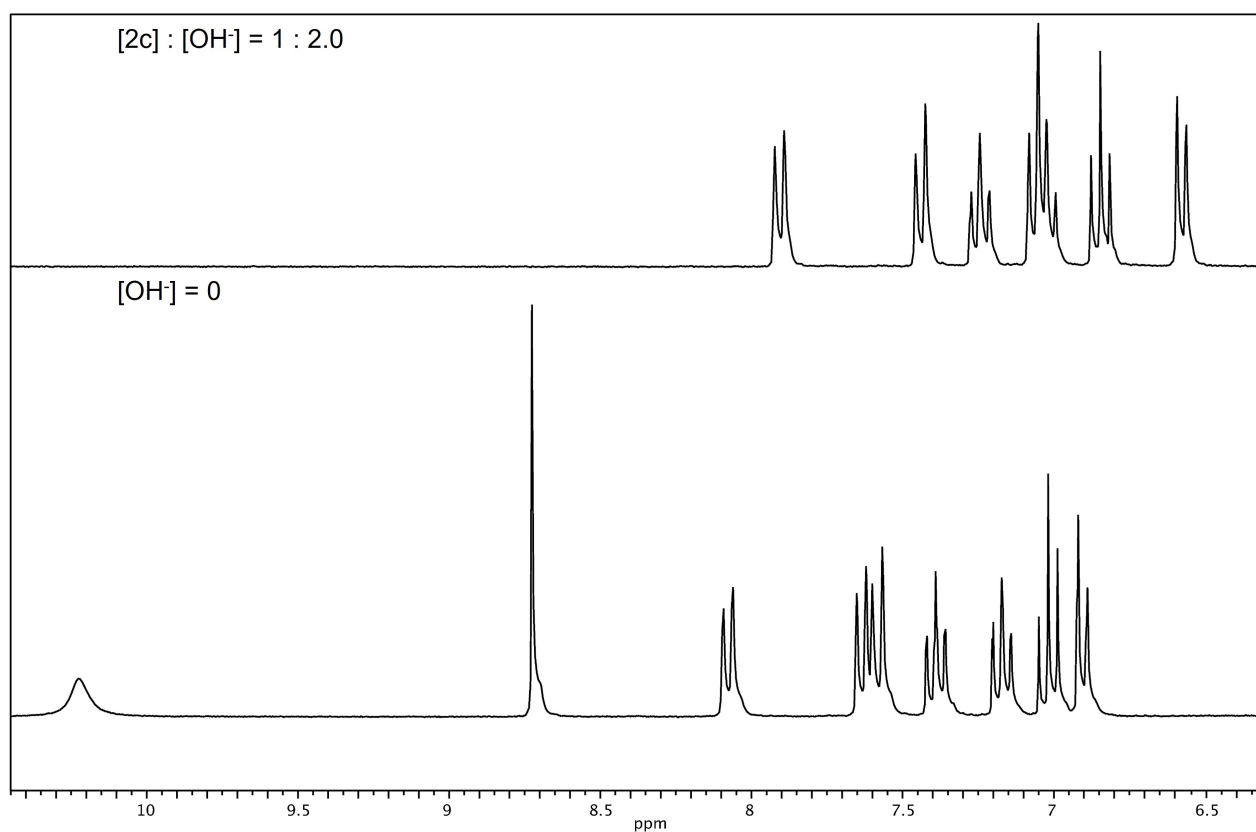

Figure S13.  $^1\text{H}$ -NMR spectra of fluorescence sensor **2c** in  $\text{d}_6$ -acetone in the presence of hydroxide anion at molar ratio indicated over each spectrum.

Table S1. Solvatochromic effect. Fluorescence emission maxima and intensities (in parenthesis) of compounds **2c** and **2e** in solvents with different polarities.

| Solvent      | $\epsilon$ | <b>2c</b>                |                                     | <b>2e</b>         |                                     |
|--------------|------------|--------------------------|-------------------------------------|-------------------|-------------------------------------|
|              |            | $\lambda_{exc}^1$        | $\lambda_{em}^2$ (FI <sup>3</sup> ) | $\lambda_{exc}^1$ | $\lambda_{em}^2$ (FI <sup>3</sup> ) |
| Hexane       | 1.9        | 250, 290*, 320, 334      | 318, 342 (47.2), 356, 366           | 256, 302*, 334    | 332, 346 (10.4)                     |
| Cyclohexane  | 2.02       | 252, 288*, 322, 334      | 320, 342, 356 (72.3)                | 256, 302*, 334    | 332, 346 (34.2)                     |
| Dioxane      | 2.21       | 250, 290*, 324, 338      | 320, 352 (64.5), 366                | 260, 306*, 334    | 342, 352 (27.3)                     |
| Benzene      | 2.3        | 290*, 324, 336           | 348 (46.3), 362                     | 306*, 334         | 336, 350 (22.5)                     |
| 1-propanol   | 20.1       | 260, 290, 338*           | 380 (15.2)                          | 258, 304*, 336    | 340, 354 (93.9)                     |
| Ethanol      | 24.3       | 252, 290*, 326, 348, 356 | 320, 370 (35.9)                     | 260, 304*, 334    | 340, 354 (87.9)                     |
| Acetone      | 20.7       | 338*                     | 364 (42.4)                          | 329*              | 348 (100), 364                      |
| Methanol     | 33.6       | 250, 290*, 306           | 316, 370 (39.0)                     | 260, 304*, 336    | 340, 354 (83.6)                     |
| Acetonitrile | 38.3       | 250, 290*, 324, 336      | 320, 366 (46.8)                     | 260, 304*, 336    | 340, 352 (86.2)                     |
| DMSO         | 45.0       | 332*, 340                | 366, 374 (33.8)                     | 310*, 334         | 342, 358 (85.7)                     |
| Water        | 80.3       | 254, 290*, 332           | 324, 368 (6.9)                      | 258, 302*, 336    | 342, 354 (99.1)                     |

$\epsilon$ : Dielectric Constant. <sup>1</sup>excitation wavelength in nm (\* $\lambda_{exc}$  employed for obtaining the fluorescence emission spectra),

<sup>2</sup>emission wavelength in nm, <sup>3</sup>FI: fluorescence intensity, in parenthesis, at the maximum emission wavelength. The fluorescence intensity is referred to the most intensity fluorescence value obtained and assigned as 100.

Table S2. Affinity constant values obtained for fluoride with sensor **2c** and chloride with sensor **2c**.

| Anion           | Slope                 | Ordinate              | R <sup>2</sup> | $K_{ass}$          | log $K_{ass}$ |
|-----------------|-----------------------|-----------------------|----------------|--------------------|---------------|
| F <sup>-</sup>  | $8.49 \times 10^{-8}$ | $1.32 \times 10^{-2}$ | 0,9794         | $1.55 \times 10^5$ | 5.19          |
| Cl <sup>-</sup> | $2.95 \times 10^{-7}$ | $2.85 \times 10^{-2}$ | 0,9242         | $9.64 \times 10^4$ | 4.98          |

The association constants sensor-anions,  $K_{ass}$ , were determined using the Benesi- Hildebrand treatment. The double reciprocal plots were obtained by correlation  $1/(F - F_0)$  (F is the fluorescence intensity in arbitrary units for a value of anion concentration and  $F_0$  is the fluorescence intensity obtained for the sensor in absence of anion).  $K_{ass}$  can be calculated by simply dividing intercept by the slope according to the following equation:

$$K_{ass} = \frac{[CZ - A^-]}{[CZ][A^-]}$$

$$\frac{1}{F} = \frac{1}{K_{ass} k \phi c_{CZ}} \frac{1}{c_{A^-}} + \frac{1}{k \phi c_{CZ}}$$

Where:

F is the fluorescence intensity or the increase in the fluorescence intensity (F -  $F_0$ )

$K_{ass}$  is the affinity or association constant

k is an instrumental constant

$\Phi$  is the fluorescence quantum yield of the complex sensor-anion

$c_{CZ}$  is the sensor concentration (constant)

$c_{A^-}$  is the anion concentration (variable)

This treatment is described in Martn, L.; Len, A.; Olives, A.I.; del Castillo, B.; Martin, M.A. Spectrofluorimetric determination of stoichiometry and association constants of the complexes of harmine and harmine with beta-cyclodextrin and chemically modified beta-cyclodextrins, *Talanta* **2003**, *60*, 493-503.

Table S3. Radius predicted for the anions to be recognized by the sensor **2c**.

| Sensor or anion  | Radius (Å)        |
|------------------|-------------------|
| <b>2c</b> cavity | 2.35 <sup>1</sup> |
| F <sup>-</sup>   | 1.19              |
| Cl <sup>-</sup>  | 1.72              |
| Br <sup>-</sup>  | 1.88              |
| CN <sup>-</sup>  | 1.91              |

<sup>1</sup> This value corresponds to the distance between the NH and the OH group hydrogens.

Table S4. Linear regression parameters obtained for the anions studied and the sensor **2c** in acetone.

| Anion            | slope                  | ordinate | R <sup>2</sup> |
|------------------|------------------------|----------|----------------|
| F <sup>-</sup>   | 1.40 x 10 <sup>5</sup> | 14.54    | 0.9702         |
| Cl <sup>-</sup>  | 5.90 x 10 <sup>4</sup> | 7.61     | 0.9355         |
| Br <sup>-</sup>  | 6.80 x 10 <sup>4</sup> | 8.15     | 0.9957         |
| CN <sup>-</sup>  | 2.00 x 10 <sup>4</sup> | 7.67     | 0.8508         |
| AcO <sup>-</sup> | 6.10 x 10 <sup>4</sup> | 6.00     | 0.7440         |
| OH <sup>-</sup>  | 6.70 x 10 <sup>3</sup> | 1.79     | 0.8728         |

Table S5. Determination of fluoride and chloride anions in real samples. Accuracy evaluation.

| Anion           | Real sample                    | Relative error (%) |
|-----------------|--------------------------------|--------------------|
| F <sup>-</sup>  | Mouthwash solution "Fluor Kin" | 3.5                |
| Cl <sup>-</sup> | medicinal spring water         | 5.1                |
